# Supplementary material for: Structure, magnetic properties and spin density of two alternative Mn(ii) coordination polymers based on 1,4-bis(2′-carboxyphenoxy)benzene
Source: Royal Society of Chemistry journal article supplement (doi:10.1039/d1dt04240h), 2022-01-01
Supplement: d1dt04240h1.pdf [file d1dt04240h1.pdf]

## Supporting Information

### Structure, magnetic properties and spin density of two alternative Mn(II) coordination polymers based on 1,4-bis(2'- carboxyphenoxy)benzene

Ai Wang,<sup>\*a</sup> Bin Yang,<sup>a,b</sup> Yan Wang,<sup>c</sup> Zijia, Hu,<sup>a</sup> Zhihong Wei,<sup>a</sup> Miaoli Zhu<sup>a</sup> and Ulli Englert<sup>a,d</sup>

**Table S1** Experimental results (1-5) for 25 mL Teflon tubes and product yields.

**Table S2** Experimental results (6-10) for 25 mL Teflon tubes and product yields.

**Table S3** Experimental results (11-15) for 25 mL Teflon tubes and product yields.

**Table S4** Experimental results (16-20) for 13 mL Teflon tubes and product yields.

**Table S5** Experimental results correlating the volume of reaction system and the product yields.

**Table S6** Selected bond lengths (Å) and bond angles (°) for complex **1**.

**Table S7** Selected bond lengths (Å) and bond angles (°) for complex **2**.

**Table S8** Bond valence values for manganese cations in complex **1**.

**Table S9** Bond valence values for manganese cations in complex **2**.

**Table S10** Energy comparison of ferromagnetic and antiferromagnetic states for two simplified models of compound **1**.

**Table S11** Comparison of structural parameters of the optimized ferromagnetic geometries of the two models of compound **1**.

**Table S12** Energy comparison of ferromagnetic and antiferromagnetic states **for 2\_Model** in compound **2**.

**Fig. S1** The different connection ways between neighboring Mn(II) ions in complexes **1** (left) and **2** (right).

**Fig. S2** Single crystals of complexes **1** (left) and **2** (right) under the microscope.

**Fig. S3** Different shapes for complexes **1** and **2** stored in plastic tubes.

**Fig. S4** (a) Infrared spectra of complex **1**; (b) Infrared spectra of complex **2**.

**Fig. S5** Infrared spectra of complex **2** with 55% filling degree of 13 mL tube (red line); the complex **2** with 80% filling degree of 25 mL tube (black line);

**Fig. S6** (a) PXRD pattern of complex **1**; (b) PXRD pattern of complex **2**.

**Fig. S7** Field dependent isothermal magnetization  $M(T, H)$  for **1** at 1.8 K from 0 to 70 KOe.

#### Information on the reaction vessels used in the syntheses:

Solvothermal reactors were bought from Jinan Henghua Sci. & Tec. Co., Ltd, China and consist of two parts. The outer vessel is made of steel (type 316) and its wall-thickness is 4.5 mm. The inner part is a white Teflon tube with a wall-thickness of 4.5 mm. The whole device can withstand heat of 250 ° and pressure of 15 MPa.

#### The process of screening experiments for the different volumes of reaction system

To establish the relationship between the product yields and the volume of reaction system, the synthesis experiments have been repeated.

As shown in Table S1, with a reaction system around 8 mL ( $V_{\text{reactants+solvent}}/V_{\text{Teflon tube}}$ ) for the 25 mL Teflon tubes, a mixture of crystalline products **1** and **2** is obtained. Due to the different solid particle sizes of the solid reactants ( $\text{MnCl}_2 \cdot 4\text{H}_2\text{O}$ ,  $\text{H}_2\text{bcpb}$  and 2,2'-bipy), the volumes of the reaction mixtures (solvent and reactants) differ slightly in the five experiments. Thus, the average yields are 22.0% for **1** and 41.0% for **2**.

**Table S1** Experimental results (1-5) for 25 mL Teflon tubes and product yields.

| Experiments                                                       | 1    | 2    | 3                                     | 4    | 5    |
|-------------------------------------------------------------------|------|------|---------------------------------------|------|------|
| $V_{\text{Teflon tube}}$ (mL)                                     |      |      | 25                                    |      |      |
| $V_{\text{reactants}^{\text{a}}+\text{solvents}^{\text{b}}}$ (mL) | 7.6  | 7.5  | 8.0                                   | 7.8  | 8.7  |
| Yield of <b>1</b> (%, based on $\text{Mn}^{2+}$ )                 | 22.0 | 23.4 | 19.0                                  | 22.0 | 36.1 |
| Yield of <b>2</b> (%, based on $\text{Mn}^{2+}$ )                 | 41.0 | 43.2 | 39.8                                  | 41.0 | 41.5 |
| Average Yield (%)                                                 |      |      | 22.0 for <b>1</b> , 41.0 for <b>2</b> |      |      |

<sup>a</sup>  $\text{MnCl}_2 \cdot 4\text{H}_2\text{O}$  (0.10 mmol, 19.80 mg)+ $\text{H}_2\text{bcpb}$  (0.05 mmol, 17.50 mg)+2,2'-bipy (0.10mmol, 15.60mg)

<sup>b</sup> **NaOH (0.5 mL, 0.25 M) and H<sub>2</sub>O (6.0 mL)**

As shown in Table S2, addition of 6 mL of water to the mixture of solvent and reactants listed in Table S1. For the five experiments 6 - 11, the average yields slightly decrease to 20.6% for **1** and 38.5% for **2**.

**Table S2** Experimental results (6-10) for 25 mL Teflon tubes and product yields.

| Experiments                   | 6 | 7 | 8  | 9 | 10 |
|-------------------------------|---|---|----|---|----|
| $V_{\text{Teflon tube}}$ (mL) |   |   | 25 |   |    |

|                                                   |                                       |      |      |      |      |
|---------------------------------------------------|---------------------------------------|------|------|------|------|
| $V_{\text{reactants}^a + \text{solvents}^b}$ (mL) | 13.6                                  | 13.5 | 14.0 | 14.8 | 14.7 |
| Yield of <b>1</b> (%, based on $\text{Mn}^{2+}$ ) | 20.1                                  | 19.6 | 19.0 | 22.0 | 22.3 |
| Yield of <b>2</b> (%, based on $\text{Mn}^{2+}$ ) | 37.3                                  | 38.1 | 39.8 | 41.0 | 36.3 |
| Average Yield (%)                                 | 20.6 for <b>1</b> , 38.5 for <b>2</b> |      |      |      |      |

<sup>a</sup>  $\text{MnCl}_2 \cdot 4\text{H}_2\text{O}$  (0.10 mmol, 19.80 mg)+ $\text{H}_2\text{bcpb}$  (0.05 mmol, 17.50 mg)+2,2'-bipy (0.10mmol, 15.60mg)

<sup>b</sup> NaOH (0.5 mL, 0.25 M) and  $\text{H}_2\text{O}$  (12.0 mL)

When the volume of reaction system of the 25 mL Teflon tube reaches to 20 mL by addition of 6 mL water to the solvents volume in Table S2, compound **2** is obtained exclusively (seeing Table S3) and the yields of complex **2** reach to 59.3%.

**Table S3** Experimental results (11-15) for 25 mL Teflon tubes and product yields.

|                                                   |                                    |      |      |      |      |
|---------------------------------------------------|------------------------------------|------|------|------|------|
| Experiments                                       | 11                                 | 12   | 13   | 14   | 15   |
| $V_{\text{Teflon tube}}$ (mL)                     | 25                                 |      |      |      |      |
| $V_{\text{reactants}^a + \text{solvents}^b}$ (mL) | 20.0                               | 20.5 | 19.5 | 20.6 | 19.4 |
| Yield of <b>1</b> (%, based on $\text{Mn}^{2+}$ ) | 0                                  | 0    | 0    | 0    | 0    |
| Yield of <b>2</b> (%, based on $\text{Mn}^{2+}$ ) | 58.0                               | 57.6 | 59.0 | 60.3 | 61.6 |
| Average Yield (%)                                 | 0 for <b>1</b> , 59.3 for <b>2</b> |      |      |      |      |

<sup>a</sup>  $\text{MnCl}_2 \cdot 4\text{H}_2\text{O}$  (0.10 mmol, 19.80 mg)+ $\text{H}_2\text{bcpb}$  (0.05 mmol, 17.50 mg)+2,2'-bipy (0.10mmol, 15.60mg)

<sup>b</sup> NaOH (0.5 mL, 0.25 M) and  $\text{H}_2\text{O}$  (18.0 mL)

For the experiments 16-20, the same synthesis recipe as listed in Table S1 is transferred into 13 mL Teflon tubes. From 13 mL Teflon tubes, pure crystalline (**2**) could be obtained in 61.0% yield based on Mn(II) (see Table S4).

**Table S4** Experimental results (16-20) for 13 mL Teflon tubes and product yields.

|                                                   |                                    |      |      |      |      |
|---------------------------------------------------|------------------------------------|------|------|------|------|
| Experiments                                       | 16                                 | 17   | 18   | 19   | 20   |
| $V_{\text{Teflon tube}}$ (mL)                     | 13                                 |      |      |      |      |
| $V_{\text{reactants}^a + \text{solvents}^b}$ (mL) | 7.0                                | 7.3  | 7.0  | 7.2  | 7.2  |
| Yield of <b>1</b> (%, based on $\text{Mn}^{2+}$ ) | 0                                  | 0    | 0    | 0    | 0    |
| Yield of <b>2</b> (%, based on $\text{Mn}^{2+}$ ) | 60.0                               | 61.3 | 59.3 | 61.8 | 62.6 |
| Average Yield (%)                                 | 0 for <b>1</b> , 61.0 for <b>2</b> |      |      |      |      |

<sup>a</sup>  $\text{MnCl}_2 \cdot 4\text{H}_2\text{O}$  (0.10 mmol, 19.80 mg)+ $\text{H}_2\text{bcpb}$  (0.05 mmol, 17.50 mg)+2,2'-bipy (0.10mmol, 15.60mg)

<sup>b</sup> NaOH (0.5 mL, 0.25 M) and  $\text{H}_2\text{O}$  (6.0 mL)

The product yields of complexes **1** and **2** in Table S5 are the average results based on the five experiments.

**Table S5** Experimental results correlating the volume of reaction system and the product yields.

|                               |    |    |
|-------------------------------|----|----|
| $V_{\text{Teflon tube}}$ (mL) | 25 | 13 |
|-------------------------------|----|----|

|                                                   |       |       |       |       |
|---------------------------------------------------|-------|-------|-------|-------|
| $V_{\text{reactants}^a + \text{solvents}^b}$ (mL) | 8     | 14    | 20    | 7     |
| Yield of <b>1</b>                                 | 22.5% | 20.6% | 0     | 0     |
| Yield of <b>2</b>                                 | 41.3% | 38.5% | 59.3% | 61.0% |

**Table S6** Selected bond lengths (Å) and bond angles (°) for complex **1**.

|                         |            |                         |            |
|-------------------------|------------|-------------------------|------------|
| Mn1-O4 <sup>i</sup>     | 2.1430(16) | Mn1-O4                  | 2.1637(15) |
| Mn1-O2                  | 2.1967(17) | Mn1-N1                  | 2.2350(19) |
| Mn1-N2                  | 2.2420(19) | Mn1-O1                  | 2.3412(18) |
| O4 <sup>i</sup> -Mn1-O4 | 76.77(6)   | O4 <sup>i</sup> -Mn1-O2 | 139.61(6)  |
| O4-Mn1-O2               | 87.91(6)   | O4 <sup>i</sup> -Mn1-N1 | 104.14(7)  |
| O4-Mn1-N1               | 170.61(7)  | O2-Mn1-N1               | 96.88(7)   |
| O4 <sup>i</sup> -Mn1-N2 | 104.55(7)  | O4-Mn1-N2               | 97.65(6)   |
| O2-Mn1-N2               | 114.50(7)  | N1-Mn1-N2               | 73.02(7)   |
| O4 <sup>i</sup> -Mn1-O1 | 87.68(6)   | O4-Mn1-O1               | 98.46(7)   |
| O2-Mn1-O1               | 57.54(6)   | N1-Mn1-O1               | 90.93(7)   |
| N2-Mn1-O1               | 90.93(7)   |                         |            |

Symmetry code: (i)-x+1, -y, -z+1

**Table S7** Selected bond lengths (Å) and bond angles (°) for complex **2**.

|            |            |             |            |
|------------|------------|-------------|------------|
| Mn1-O8     | 2.1337(19) | Mn1-O4      | 2.1633(19) |
| Mn1-O1     | 2.1990(19) | Mn1-O5      | 2.2028(19) |
| Mn1-N2     | 2.290(2)   | Mn1-N1      | 2.296(2)   |
| Mn2-O6     | 2.065(2)   | Mn2-O9      | 2.0885(19) |
| Mn2-O11    | 2.2083(18) | Mn2-N4      | 2.243(2)   |
| Mn2-N3     | 2.281(2)   | Mn2-O12     | 2.3330(19) |
| O8-Mn1-O4  | 113.15(8)  | O8-Mn1-O1   | 91.56(8)   |
| O4-Mn1-O1  | 86.99(8)   | O8-Mn1-O5   | 89.59(8)   |
| O4-Mn1-O5  | 90.61(8)   | O1-Mn1-O5   | 177.58(7)  |
| O8-Mn1-N2  | 155.57(8)  | O4-Mn1-N2   | 90.83(8)   |
| O1-Mn1-N2  | 84.83(8)   | O5-Mn1-N2   | 94.99(8)   |
| O8-Mn1-N1  | 85.24(8)   | O4-Mn1-N1   | 161.56(8)  |
| O1-Mn1-N1  | 91.37(8)   | O5-Mn1-N1   | 90.84(8)   |
| N2-Mn1-N1  | 70.73(9)   | O6-Mn2-O9   | 92.58(8)   |
| O6-Mn2-O11 | 103.47(8)  | O9-Mn2-O11  | 98.90(7)   |
| O6-Mn2-N4  | 162.40(9)  | O9-Mn2-N4   | 86.20(8)   |
| O11-Mn2-N4 | 94.06(8)   | O6-Mn2-N3   | 93.41(9)   |
| O9-Mn2-N3  | 116.06(8)  | O11-Mn2-N3  | 140.40(8)  |
| N4-Mn2-N3  | 71.57(9)   | O6-Mn2-O12  | 93.44(8)   |
| O9-Mn2-O12 | 156.38(8)  | O11-Mn2-O12 | 57.48(7)   |
| N4-Mn2-O12 | 94.66(8)   | N3-Mn2-O12  | 86.35(8)   |

**Table S8** Bond valence values for manganese cations in complex **1**.

| Bond                | Bond distance | Bond valence (based on Mn(II)) | Bond valence (based on Mn(III)) |
|---------------------|---------------|--------------------------------|---------------------------------|
| Mn1-O4 <sup>i</sup> | 2.1430(16)    | 0.385                          | 0.355                           |
| Mn1-O4              | 2.1637(15)    | 0.364                          | 0.335                           |
| Mn1-O2              | 2.1967(17)    | 0.333                          | 0.307                           |
| Mn1-N1              | 2.2350(19)    | 0.352                          | 0.341                           |
| Mn1-N2              | 2.2420(19)    | 0.346                          | 0.335                           |
| Mn1-O1              | 2.3412(18)    | 0.226                          | 0.208                           |
|                     |               | 2.005                          | 1.881                           |

**Table S9** Bond valence values for manganese cations in complex **2**.

| Bond    | Bond distance | Bond valence (based on Mn(II)) | Bond valence (based on Mn(III)) |
|---------|---------------|--------------------------------|---------------------------------|
| Mn1-O8  | 2.1337(19)    | 0.395                          | 0.364                           |
| Mn1-O4  | 2.1633(19)    | 0.365                          | 0.336                           |
| Mn1-O1  | 2.1990(19)    | 0.331                          | 0.305                           |
| Mn1-O5  | 2.2028(19)    | 0.328                          | 0.302                           |
| Mn1-N2  | 2.290(2)      | 0.304                          | 0.294                           |
| Mn1-N1  | 2.296(2)      | 0.298                          | 0.288                           |
|         |               | 2.019                          | 1.890                           |
| Mn2-O6  | 2.065(2)      | 0.474                          | 0.437                           |
| Mn2-O9  | 2.0885(19)    | 0.446                          | 0.412                           |
| Mn2-O11 | 2.2083(18)    | 0.323                          | 0.298                           |
| Mn2-N4  | 2.243(2)      | 0.345                          | 0.334                           |
| Mn2-N3  | 2.281(2)      | 0.311                          | 0.301                           |
| Mn2-O12 | 2.3330(19)    | 0.231                          | 0.213                           |
|         |               | 2.130                          | 1.994                           |

**Table S10** Energy comparison of ferromagnetic and antiferromagnetic states for two simplified models of compound **1**.

| Functional/Basis | Energy (298.15 K)                                      | 1_Model I   |             | 1_Model II   |              |
|------------------|--------------------------------------------------------|-------------|-------------|--------------|--------------|
|                  |                                                        | f*          | af*         | f            | af           |
| B3LYP/Def2TZV    |                                                        | -           | -           |              |              |
| P                |                                                        | 4974.531719 | 4974.531713 | -4974.527463 | -4974.527827 |
|                  | Electronic Energy(E)/Hartree                           |             |             |              |              |
|                  | $\Delta E(\text{kJ/mol}) = E(\text{f}) - E(\text{af})$ |             | -0.0158     |              | -0.9557      |
|                  | $\Delta G(\text{kJ/mol}) = G(\text{f}) - G(\text{af})$ |             | -5.0094     |              | -4.9753      |
| B3LYP/D3BJ/      |                                                        | -           | -           |              |              |
| Def2TZVP         | Electronic Energy(E)/Hartree                           | 4975.380571 | 4975.380606 | -4975.373202 | -4975.373525 |
|                  | $\Delta E(\text{kJ/mol}) = E(\text{f}) - E(\text{af})$ |             | -0.0919     |              | -0.8467      |

|                |                                                        |             |             |
|----------------|--------------------------------------------------------|-------------|-------------|
|                | $\Delta G(\text{kJ/mol}) = G(\text{f}) - G(\text{af})$ | -4.9018     | -5.0843     |
| M06L/ Def2TZVP |                                                        | -           | -           |
|                | Electronic Energy(E)/Hartree                           | 4974.654273 | 4974.654248 |
|                | $\Delta E(\text{kJ/mol}) = E(\text{f}) - E(\text{af})$ | -0.06695    | -1.0171     |
|                | $\Delta G(\text{kJ/mol}) = G(\text{f}) - G(\text{af})$ | -5.0606     | -4.91389    |
| MN15/ Def2TZVP |                                                        | -           | -           |
|                | Electronic Energy(E)/Hartree                           | 4972.114839 | 4972.115106 |
|                | $\Delta E(\text{kJ/mol}) = E(\text{f}) - E(\text{af})$ | -0.6997     | -0.6041     |
|                | $\Delta G(\text{kJ/mol}) = G(\text{f}) - G(\text{af})$ | -4.2940     | -5.3269     |

\*af = antiferromagnetic; f = ferromagnetic

**Table S11** Comparison of structural parameters of the optimized ferromagnetic geometries of the two models of compound **1**.

|                                 | <b>1_Exp.</b> | <b>1_Modle I</b> | <b>1_Modle II</b> |
|---------------------------------|---------------|------------------|-------------------|
| Spin-coupling                   | ferromagnetic | ferromagnetic    | ferromagnetic     |
| Mn1-O4(Å)                       | 2.14          | 2.17             | 2.13              |
| Mn1-O4'(Å)                      | 2.16          | 2.17             | 2.14              |
| Mn1-O2(Å)                       | 2.19          | 2.21             | 2.20              |
| Mn1-N1(Å)                       | 2.24          | 2.30             | 2.31              |
| Mn1-N2(Å)                       | 2.24          | 2.33             | 2.34              |
| Mn1-O1(Å)                       | 2.34          | 2.29             | 2.36              |
| Mn1-O4-Mn2(°)                   | 103.23        | 101.2            | 91.76             |
| O4-Mn1-O4'(°)                   | 76.77         | 78.8             | 97.50             |
| O4-Mn1-O2(°)                    | 139.61        | 105.70           | 102.40            |
| O4-Mn1-N2(°)                    | 97.65         | 91.20            | 98.93             |
| Mn1...Mn2(Å)                    | 3.38          | 3.36             | 4.48              |
| Spin-densities <sup>a</sup> Mn1 | --            | 4.85             | 4.85              |
| Spin-densities <sup>a</sup> Mn2 | --            | 4.85             | 4.85              |
| Energy/Hartree                  |               | -4974.654273     | -4974.651211      |

<sup>a</sup>Mulliken spin-density. i: -x+1,-y,-z+1

**Table S12** Energy comparison of ferromagnetic and antiferromagnetic states for 2\_Model in compound **2**.

| Functional/Basis | <b>2_Model</b> |
|------------------|----------------|
|------------------|----------------|

|                    | Energy (298.15 K)                           | f*                 | af*                |
|--------------------|---------------------------------------------|--------------------|--------------------|
| B3LYP/Def2TZVP     | Electronic Energy(E)/Hartree                | -5051.00596        | -5051.005842       |
|                    | $\Delta E(\text{kJ/mol})=E(f)-E(\text{af})$ |                    | -0.3098            |
|                    | $\Delta G(\text{kJ/mol})=G(f)-G(\text{af})$ |                    | -3.0062            |
| B3LYP/D3BJ/Def2TZV | Electronic Energy(E)/Hartree                | -5051.867583       | -5051.867833       |
|                    | $\Delta E(\text{kJ/mol})=E(f)-E(\text{af})$ |                    | -0.6569            |
|                    | $\Delta G(\text{kJ/mol})=G(f)-G(\text{af})$ |                    | -3.9729            |
| M06L/Def2TZVP      | Electronic Energy(E)/Hartree                | <b>-5051.13039</b> | <b>-5051.13052</b> |
|                    | $\Delta E(\text{kJ/mol})=E(f)-E(\text{af})$ |                    | <b>0.3423</b>      |
|                    | $\Delta G(\text{kJ/mol})=G(f)-G(\text{af})$ |                    | <b>2.9736</b>      |
| MN15/Def2TZVP      | Electronic Energy(E)/Hartree                | -5048.52784        | -5048.527886       |
|                    | $\Delta E(\text{kJ/mol})=E(f)-E(\text{af})$ |                    | -0.1210            |
|                    | $\Delta G(\text{kJ/mol})=G(f)-G(\text{af})$ |                    | -3.4370            |

\*af = antiferromagnetic; f = ferromagnetic

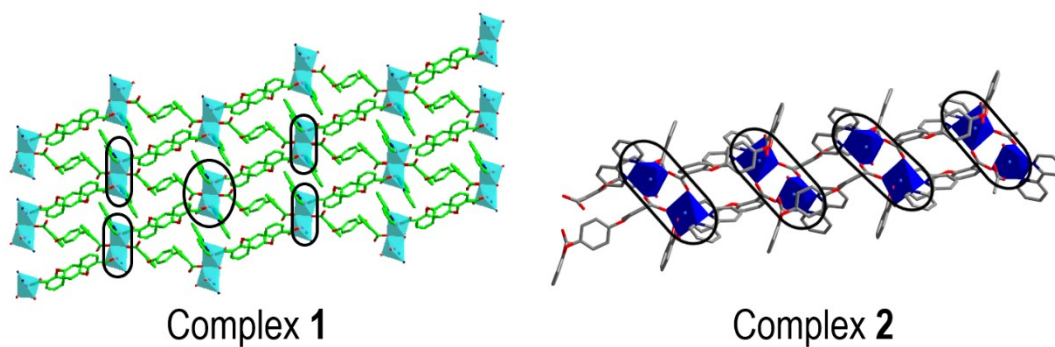

**Fig. S1** The different connection ways between neighboring Mn(II) ions in complexes 1 (left) and 2 (right).

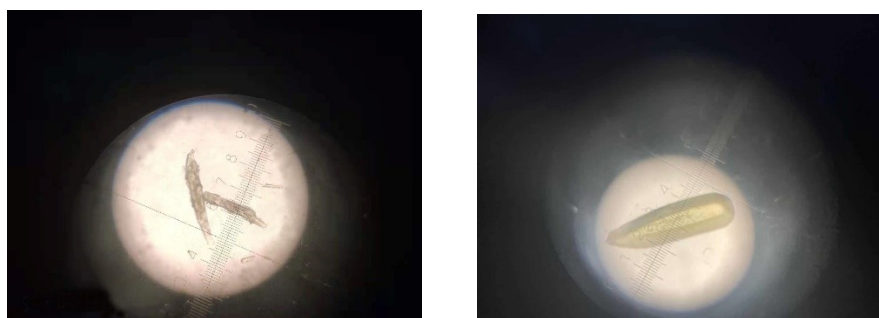

**Fig. S2** Single crystals of complexes 1 (left) and 2 (right) under the microscope.

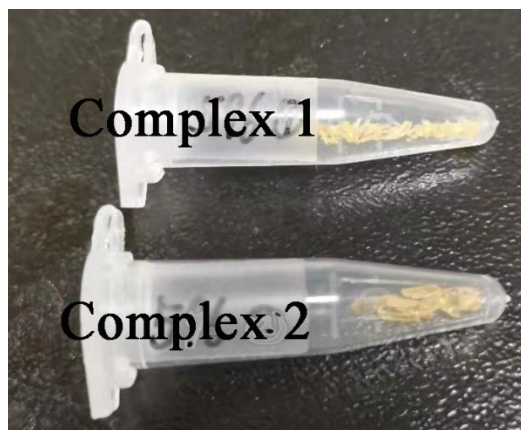

Fig. S3 Different shapes for complexes 1 and 2 stored in plastic tubes.

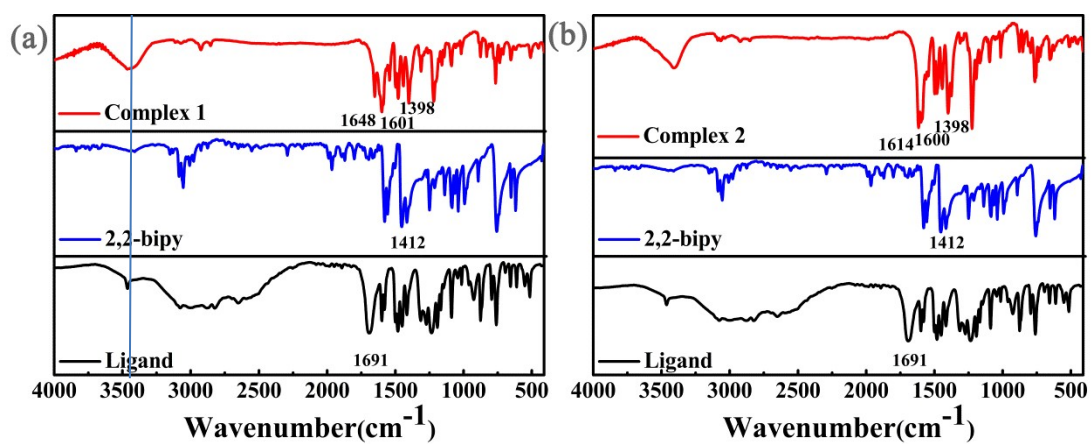

Fig. S4 (a) Infrared spectra of complex 1; (b) Infrared spectra of complex 2.

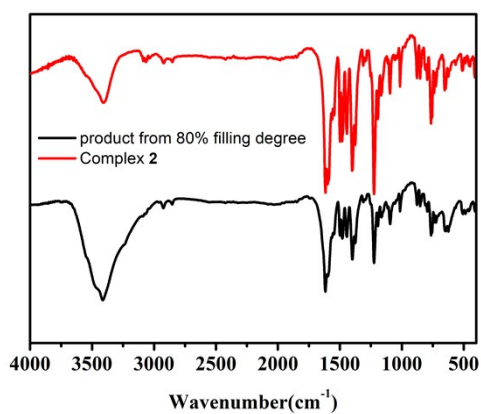

Fig. S5 Infrared spectra of complex 2 with 55% filling degree of 13 mL tube (red line); the complex 2 with 80% filling degree of 25 mL tube (black line);



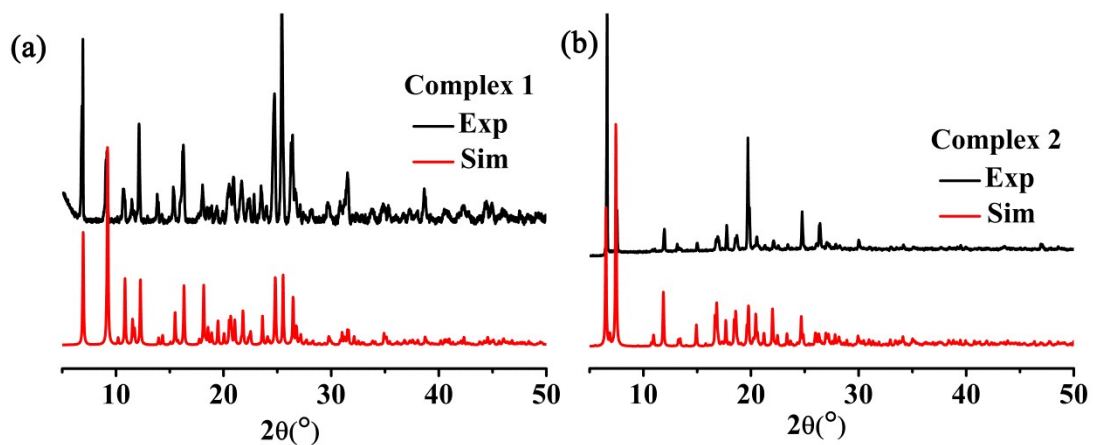

Fig. S6 (a) PXRD pattern of complex 1; (b) PXRD pattern of complex 2.

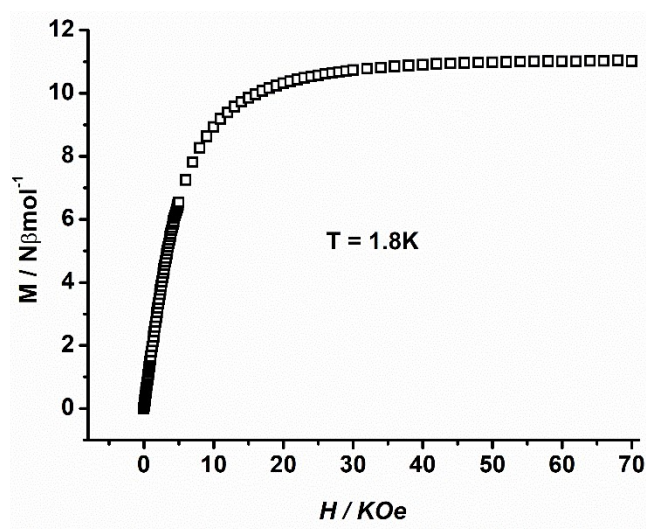

Fig. S7 Field dependent isothermal magnetization  $M(T, H)$  for 1 at 1.8 K from 0 to 70 KOe.
